# Supplementary material for: Effects of transcriptional mode on promoter substitution and tandem engineering for the production of epothilones in Myxococcus xanthus
Source: PubMed Central journal article supplement (PMC5999154; doi:10.1007/s00253-018-9023-4), 2018-04-28
Supplement: 253_2018_9023_MOESM1_ESM.pdf [file 253_2018_9023_MOESM1_ESM.pdf]

## Supplementary Material

**Journal:** *Applied Microbiology and Biotechnology*

**Title:** Effects of transcriptional mode on promoter substitution and tandem engineering for the production of epothilones in *Myxococcus xanthus*

**Authors:** Xin-jing Yue<sup>§</sup>, Xiao-wen Cui<sup>§</sup>, Zheng Zhang, Wei-feng Hu, Zhi-feng Li, You-ming Zhang, Yue-zhong Li\*

<sup>§</sup> These authors contribute equally to this paper. \*The corresponding author.

State Key Laboratory of Microbial Technology, School of Life Science, Shandong University, Jinan 250100, China

**Authors' email addresses:**

Xin-jing Yue, xinjing92@126.com

Xiao-wen Cui, cuixw93@163.com

Zheng Zhang, zhzhang.sdu@gmail.com

Wei-feng Hu, weifenghu94@163.com

Zhi-feng Li, lizhifeng@sdu.edu.cn

You-ming Zhang, zhangyouming@sdu.edu.cn

**Yue-zhong Li**, llilab@sdu.edu.cn,

Tel: +86-531-88564288; Fax: +86-531-88564288

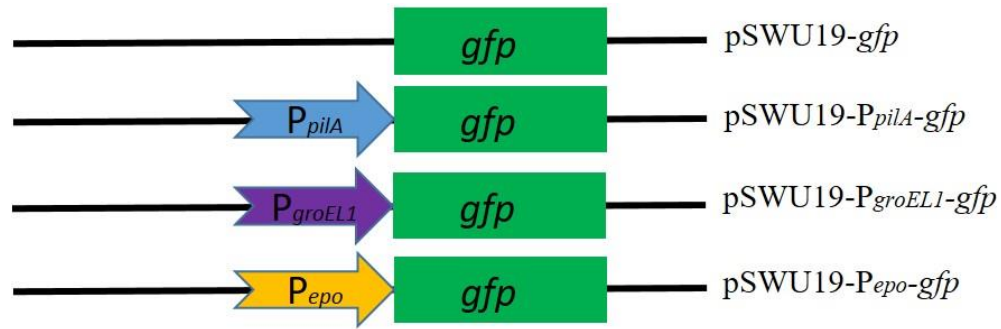

Fig S1. Diagrammatic sketch for the construction of *gfp* reporter vectors

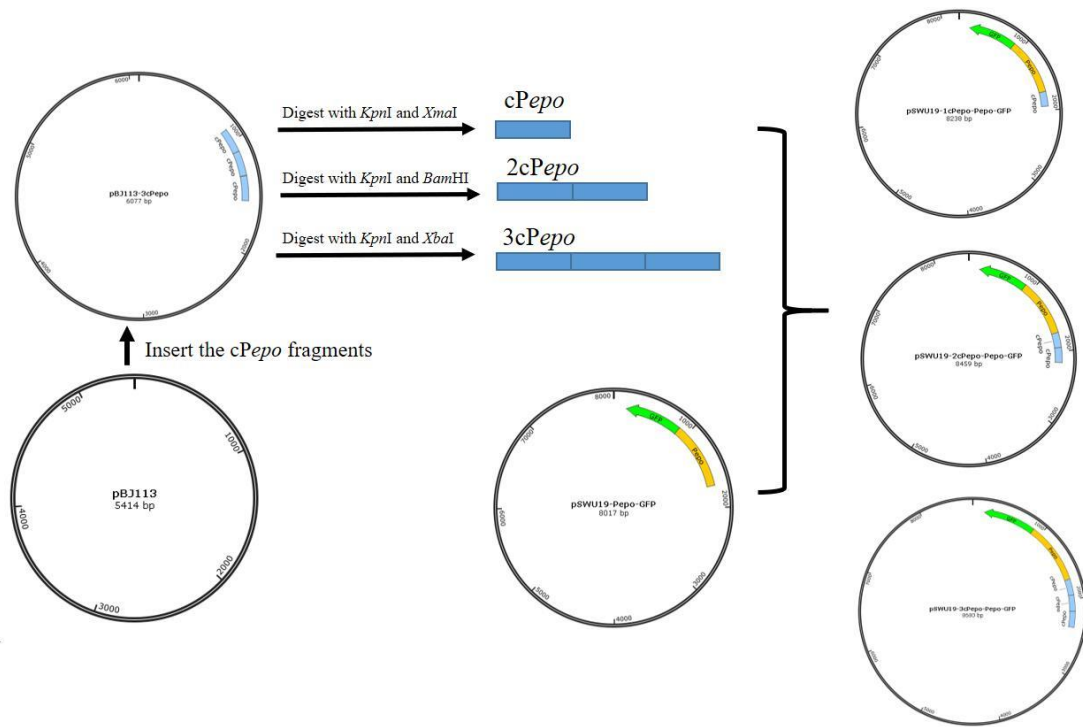

Fig S2. Diagrammatic sketch for the construction of tandem promoter clusters and corresponding reporter vectors

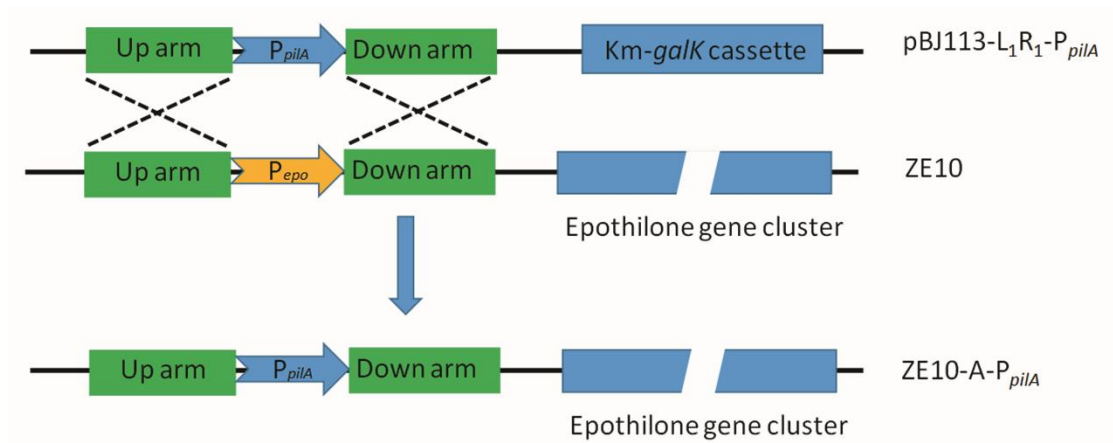

Fig S3. Diagrammatic sketch for the construction of substitution vectors and substitution mutants. Up arm and down arm represent the homologous arms for homologous recombination; Km-*galK* represent the selection markers (kanamycin resistant gene and galactokinase gene).

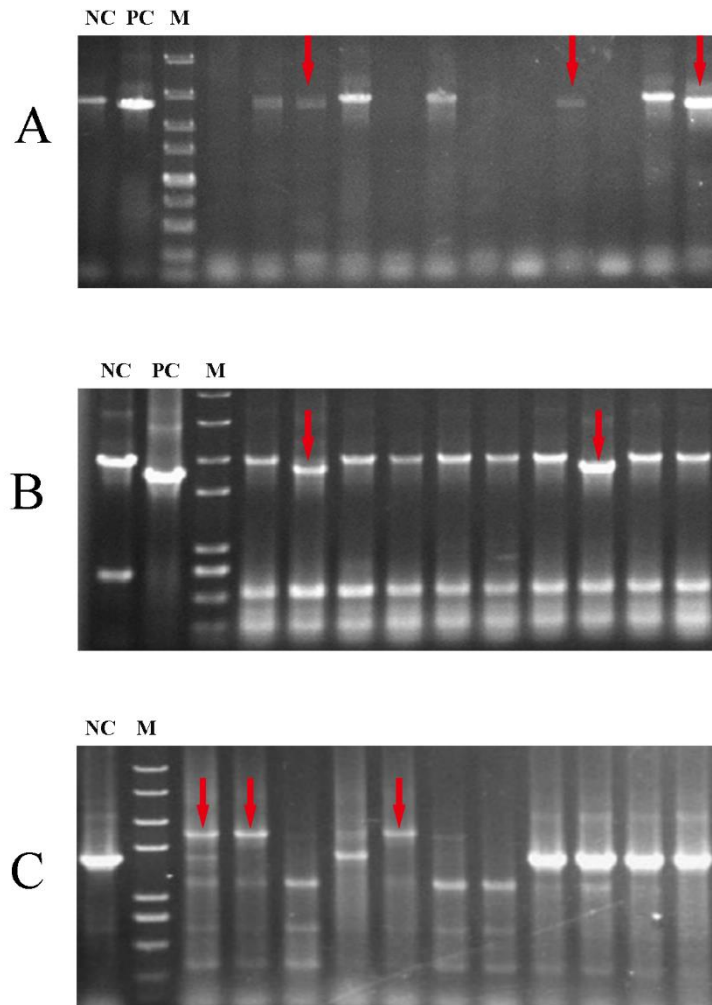

Fig S4. Screening of the promoter manipulation mutant strains by colony PCR. The lanes marked with red arrow were the positive mutant strains. (A) Screening of ZE10-A- $P_{pilA}$ . NC, the DZ2 genome was used as template; PC, plasmid pBJ113-L<sub>2</sub>R<sub>2</sub>- $P_{pilA}$  was used as template; M, the DL5000 DNA Marker (from top to bottom, 5,000 bp, 3,000 bp, 2,000 bp, 1,500 bp, 1,000 bp, 750 bp, 500 bp, 250 bp, and 100 bp). (B) Screening of ZE10-A- $P_{groEL1}$ . NC, the DZ2 genome was used as template; PC, plasmid pBJ113-L<sub>2</sub>R<sub>2</sub>- $P_{groEL1}$  was used as template; M, the Trans 2K Plus II DNA Marker (from top to bottom, 8,000 bp, 5,000 bp, 3,000 bp, 2,000 bp, 1,000 bp, 750 bp, 500 bp, 250 bp, and 100 bp). (C) Screening of ZE10-3c $P_{epo}$ . NC, the ZE10 genome was used as template; M, the Trans 2K Plus II DNA Marker.

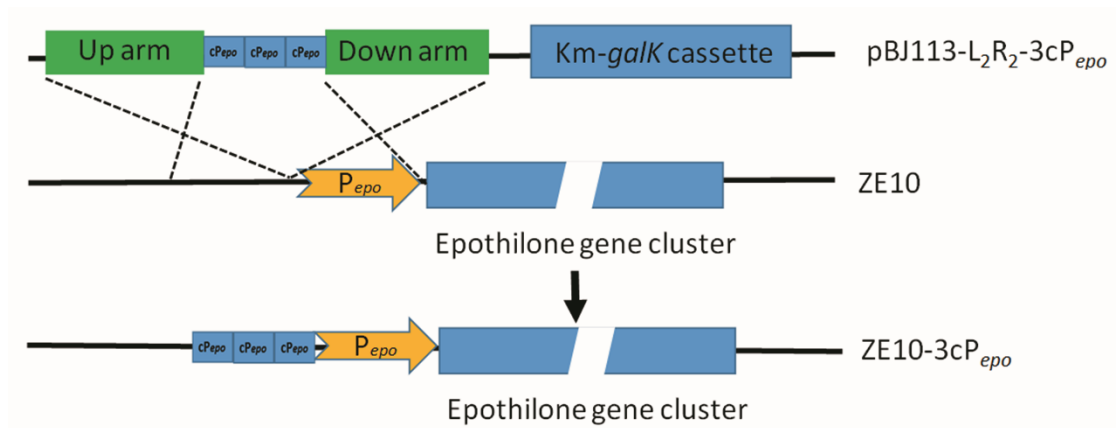

Fig S5. Diagrammatic sketch for the construction of mutants with tandem promoters. Up arm and down arm represent the homologous arm for homologous recombination; Km-*galk* represent the selection markers (kanamycin resistant gene and galactokinase gene).

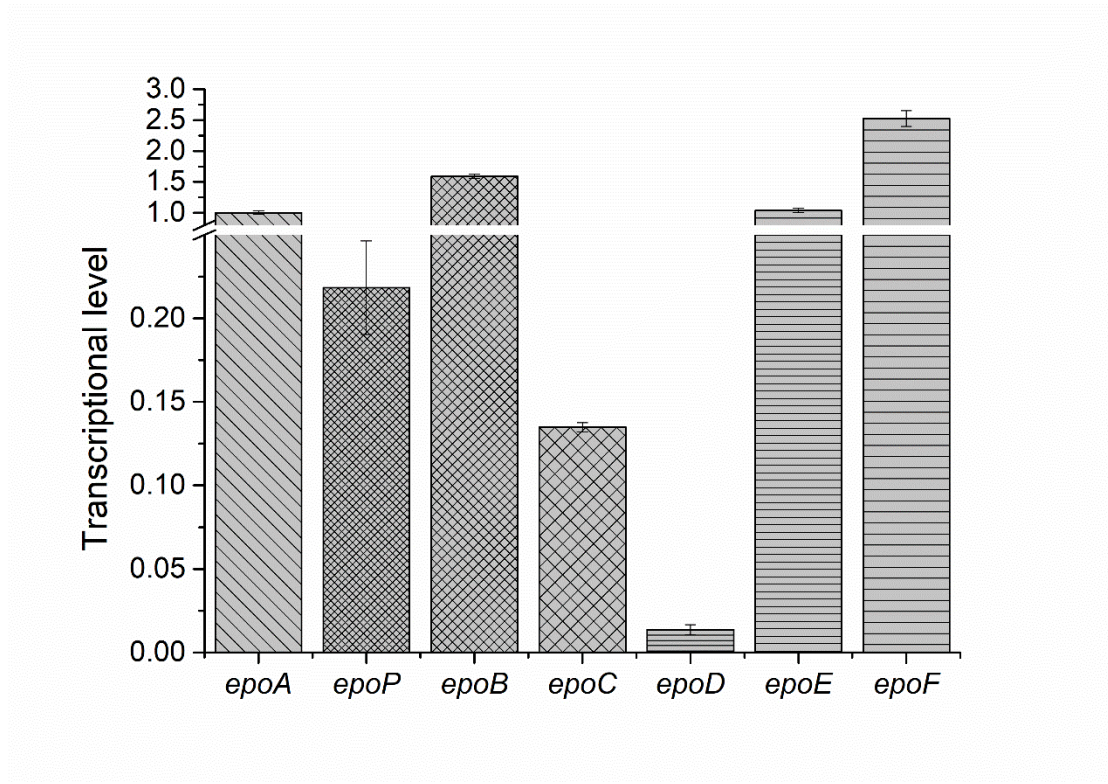

Fig S6. The relative transcriptional levels of epothilone genes in ZE10 at 12 h of incubation. The transcriptional level of *epoA* was set as 1. The error bars represent the standard deviation of three independent experiments.

**Table S1. Strains and plasmids used in this study**

| Strain and plasmid                                                     | Relevant characteristics                                                                                                                                                                  | Source or reference      |
|------------------------------------------------------------------------|-------------------------------------------------------------------------------------------------------------------------------------------------------------------------------------------|--------------------------|
| <b>Strains</b>                                                         |                                                                                                                                                                                           |                          |
| <i>E. coli</i> DH5 $\alpha$                                            | F <sup>-</sup> , <i>supE44</i> , $\Delta$ <i>lacU169</i> ( $\phi$ 80 <i>lacZ</i> <i>AM15</i> ), <i>hsdR17</i> , <i>recA1</i> , <i>endA1</i> , <i>gyrA96</i> , <i>thi-1</i> , <i>relA1</i> | Life Technologies        |
| <i>E. coli</i> DH5 $\alpha$ ( $\lambda$ <i>pir</i> )                   | DH5 $\alpha$ containing $\lambda$ <i>pir</i> gene                                                                                                                                         | H.B. Kaplan              |
| <i>M. xanthus</i> DZ2                                                  | Derived from <i>M. xanthus</i> FB (ATCC 19368)                                                                                                                                            | (Müller et al. 2013)     |
| <i>M. xanthus</i> DK 1622                                              | Derived from <i>M. xanthus</i> FB (ATCC 19368)                                                                                                                                            | (Wall et al. 1999)       |
| <i>M. xanthus</i> ZE10                                                 | A heterologous expressional host of epothilone, derived from <i>M. xanthus</i> DZ2                                                                                                        | This lab                 |
| DZ2- <i>gfp</i>                                                        | DZ2 with integration of pSWU19- <i>gfp</i>                                                                                                                                                | This study               |
| DZ2-P <sub><i>pilA</i></sub> - <i>gfp</i>                              | DZ2 with integration of pSWU19-P <sub><i>pilA</i></sub> - <i>gfp</i>                                                                                                                      | This study               |
| DZ2-P <sub><i>groEL</i></sub> - <i>gfp</i>                             | DZ2 with integration of pSWU19-P <sub><i>groEL</i></sub> - <i>gfp</i>                                                                                                                     | This study               |
| DZ2-P <sub><i>epo</i></sub> - <i>gfp</i>                               | DZ2 with integration of pSWU19-P <sub><i>epo</i></sub> - <i>gfp</i>                                                                                                                       | This study               |
| DZ2-ncP <sub><i>epo</i></sub> -P <sub><i>epo</i></sub> - <i>gfp</i>    | DZ2 with integration of pSWU19-ncP <sub><i>epo</i></sub> -P <sub><i>epo</i></sub> - <i>gfp</i> (n=1,2,3)                                                                                  | This study               |
| ZE10-3cP <sub><i>epo</i></sub>                                         | ZE10 with 3cP <sub><i>epo</i></sub> inserted upstream of P <sub><i>epo</i></sub>                                                                                                          | This study               |
| ZE10-A-P <sub><i>pilA</i></sub>                                        | ZE10 with P <sub><i>epo</i></sub> replaced by P <sub><i>pilA</i></sub>                                                                                                                    | This study               |
| ZE10-A-P <sub><i>groEL</i></sub>                                       | ZE10 with P <sub><i>epo</i></sub> replaced by P <sub><i>groEL</i></sub>                                                                                                                   | This study               |
| <b>Plasmids</b>                                                        |                                                                                                                                                                                           |                          |
| pJBA28                                                                 | Containing <i>gfp</i> gene, Ap <sup>r</sup> ; Km <sup>r</sup>                                                                                                                             | (Andersen et al. 1998)   |
| p15A-CT-epo                                                            | Containing epothilone gene cluster and flanking sequence, Apra <sup>r</sup>                                                                                                               | This lab                 |
| pBJ113                                                                 | Gene replacement vector with KG cassette; Km <sup>r</sup>                                                                                                                                 | Z.M. Yang, Virginia Tech |
| pSWU19                                                                 | Site specific integration vector with Mx8 attB integration site (Mx8); Km <sup>r</sup>                                                                                                    | (Wu and Kaiser 1997)     |
| pBJ113-3cP <sub><i>epo</i></sub>                                       | Ligating three tandem promoters to the pBJ113                                                                                                                                             | This study               |
| pBJ113-L <sub>1</sub> R <sub>1</sub> -3cP <sub><i>epo</i></sub>        | Ligating the two homologous arms for insertion to the pBJ113                                                                                                                              | This study               |
| pBJ113-L <sub>2</sub> R <sub>2</sub> -P <sub><i>pilA</i></sub>         | Ligating the two homologous arms for replacement the pBJ113                                                                                                                               | This study               |
| pBJ113-L <sub>2</sub> R <sub>2</sub> P <sub><i>groEL</i></sub>         | Ligating the two homologous arms for replacement the pBJ113                                                                                                                               | This study               |
| pSWU19- <i>gfp</i>                                                     | Ligating <i>gfp</i> to the pSWU19                                                                                                                                                         | This study               |
| pSWU19-P <sub><i>epo</i></sub> - <i>gfp</i>                            | Ligating P <sub><i>epo</i></sub> - <i>gfp</i> fusion fragment to the pSWU19                                                                                                               | This study               |
| pSWU19-P <sub><i>pilA</i></sub> - <i>gfp</i>                           | Ligating P <sub><i>pilA</i></sub> fragment to the pSWU19- <i>gfp</i>                                                                                                                      | This study               |
| pSWU19-P <sub><i>groEL</i></sub> - <i>gfp</i>                          | Ligating P <sub><i>groEL</i></sub> fragment to the pSWU19- <i>gfp</i>                                                                                                                     | This study               |
| pSWU19-ncP <sub><i>epo</i></sub> -P <sub><i>epo</i></sub> - <i>gfp</i> | Ligating n cP <sub><i>epo</i></sub> fragment to the pSWU19-P <sub><i>epo</i></sub> - <i>gfp</i> (n=1,2,3)                                                                                 | This study               |



**Table S2. Primers used in construction of vectors and mutant strains**

| Primer name            | Sequence (5'-3')                          | Restriction Site |
|------------------------|-------------------------------------------|------------------|
| M13-F                  | CAGGAAACAGCTATGACC                        | None             |
| M13-R                  | TGTAAAACGACGGCCAGT                        | None             |
| P1-F                   | GGGGTACC                                  | <i>KpnI</i>      |
| P1-R                   | TCCC                                      | <i>XmaI</i>      |
| P2-F                   | TCCC                                      | <i>XmaI</i>      |
| P2-R                   | CGGGATCC                                  | <i>BamHI</i>     |
| P3-F                   | CGGGATCC                                  | <i>BamHI</i>     |
| P3-R                   | CGTCTAGA                                  | <i>XbaI</i>      |
| pE-F                   | GCTCTAGA                                  | <i>XbaI</i>      |
| pE-R                   | AGCTCGGCGCCCTTGCTACCATGACGGGCACATCCTCAGCG | None             |
| P <sub>pilA</sub> -F   | GGGGTACC                                  | <i>KpnI</i>      |
| P <sub>pilA</sub> -R   | GCTCTAGA                                  | <i>XbaI</i>      |
| P <sub>groEL1</sub> -F | GGGGTACC                                  | <i>KpnI</i>      |
| P <sub>groEL1</sub> -R | GCTCTAGA                                  | <i>XbaI</i>      |
| gfp-F1                 | ATGGTGAGCAAGGGCGCCGAGCT                   | None             |
| gfp-R1                 | CCC                                       | <i>HindIII</i>   |
| gfp-F2                 | GCTCTAGA                                  | <i>XbaI</i>      |
| gfp-R2                 | CCC                                       | <i>HindIII</i>   |
| pSWU19-F               | GCAAGGCGATTAAGTTGGGTA                     | None             |
| pSWU19-R               | GGCTCGTATGTTGTGTGG                        | None             |
| L1-F                   | GGAATTC                                   | <i>EcoRI</i>     |
| L1-R                   | GGGGTACC                                  | <i>KpnI</i>      |
| R1-F                   | GCTCTAGA                                  | <i>XbaI</i>      |
| R1-R                   | CCC                                       | <i>HindIII</i>   |
| L2-F                   | GGAATTC                                   | <i>EcoRI</i>     |
| L2-R                   | GGGGTACC                                  | <i>KpnI</i>      |
| R2-F                   | GCTCTAGA                                  | <i>XbaI</i>      |
| R2-R                   | CCC                                       | <i>HindIII</i>   |
| KG-F                   | GCTCTAGAGCTAGCCGAAATGACCGACCAAGC          | None             |
| KG-R                   | GGTGCCAGTGCGGGAGTTTCG                     | None             |
| Test-F                 | CAGTATGCAAAGTTCTGGATCG                    | None             |
| Test-R                 | GATCCGCCACGACGGGCACAT                     | None             |

**Table S3. Primers used in RT-qPCR.**

| Primer name    | Sequence (5'-3')        |
|----------------|-------------------------|
| <i>epoA</i> -F | GCGTTCCACTCACCGCTCAT    |
| <i>epoA</i> -R | GCCTTCCCGCTCAGATTGCT    |
| <i>epoP</i> -F | GCTCAACATAACGCTCTTCAACC |
| <i>epoP</i> -R | CTGGACCTCGATACCGCTCA    |
| <i>epoB</i> -F | ATGGAAGAACAAGATTCCTC    |
| <i>epoB</i> -R | CTCGGAGAAGCGCTGCACGG    |
| <i>epoC</i> -F | GAAGATGCGGTGAGGTTGGTGG  |
| <i>epoC</i> -R | TCGGACGCTGCGATGGCTAC    |
| <i>epoD</i> -F | GTGACAGACCGAGAAGGAC     |
| <i>epoD</i> -R | CCACGATGGCGATCGGCTCG    |
| <i>epoE</i> -F | GCACCGTTTGCGTTAGTAGGG   |
| <i>epoE</i> -R | GCTTGGCTATTATGTCGGTCTCC |
| <i>epoF</i> -F | GGAGCAAGCGAATCAGAGTG    |
| <i>epoF</i> -R | CGTGGTATCGGGTGAGGAC     |
| <i>gapA</i> -F | GCCCTGGAAGAGCCTGAACG    |
| <i>gapA</i> -R | TGGAGACGATGTGGTGCTTGG   |
